# Supplementary material for: Predictive network modeling of the high-resolution dynamic plant transcriptome in response to nitrate
Source: PubMed Central journal article supplement (PMC3046483; doi:10.1186/gb-2010-11-12-r123), 2010-12-23

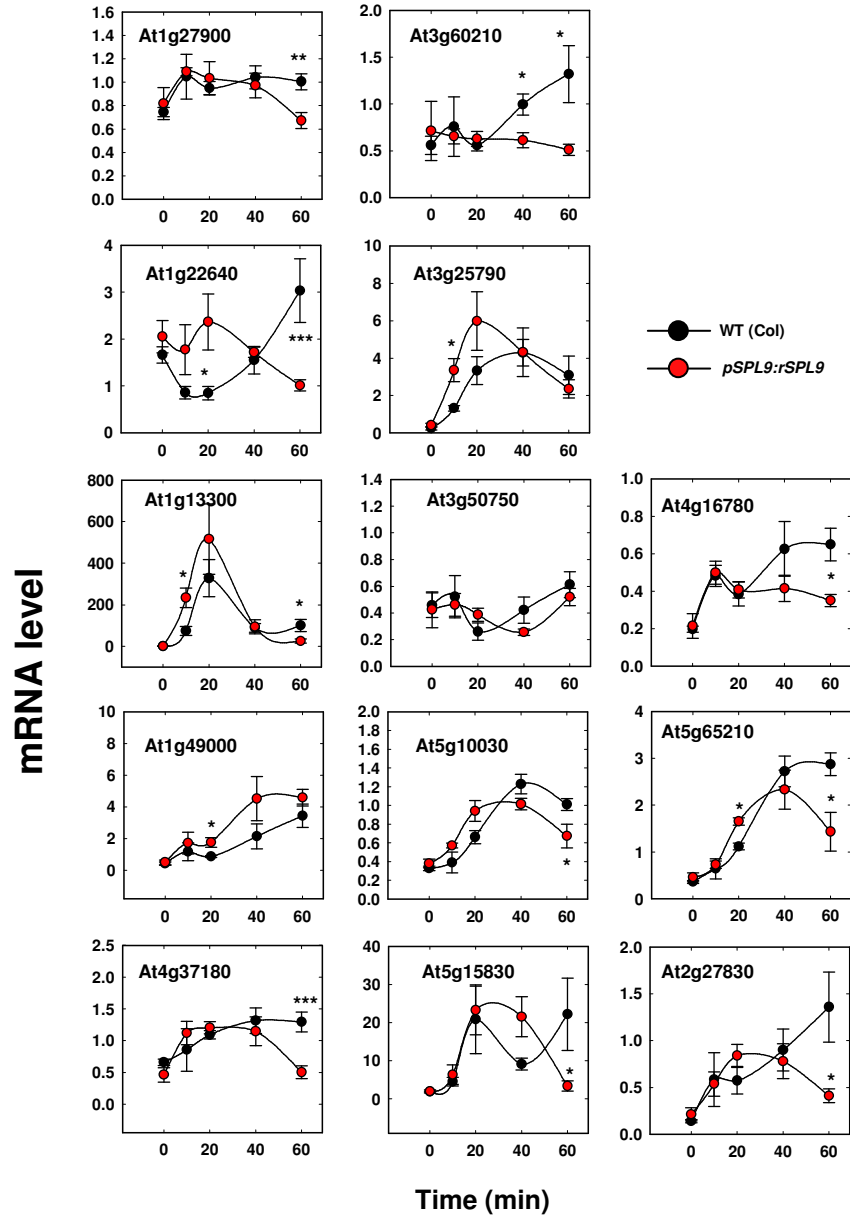

Supplement: gb-2010-11-12-r123-S5.pdf [file gb-2010-11-12-r123-S5.pdf]
